# Supplementary material for: Reprocessing of XBT profiles from the Ligurian and Tyrrhenian seas over the time period 1999–2019 with full metadata upgrade
Source: Copernicus journal article supplement (doi:10.5194/essd-2023-525), 2024-01-03
Supplement: Supplementary file [file essd-2023-525-AC1-supplement.pdf]

## Reviewer 1

### General comments:

The manuscript describes the re-processing of historical XBT data collected in the Mediterranean Sea from 1999-2019. The reprocessing involved not only creation of automated quality control procedures, addition of a test canister 'calibration' offset and new linear interpolation method, but addition of complete metadata information. The addition of accurate metadata is vital for end users to be able to correct data as new research becomes available.

The presentation of data via the ERDDAP server system makes it accessible to all, although there are some improvements to the data format that need to be made (see comments below). The text itself is well written, but could do with some grammar checks and re-wording to make quite complex sentences simpler. I have given some specific comments on this, but it doesn't cover all of them. Overall, the structure of the manuscript is very good and quite thorough.

The re-processing of such a valuable historical dataset is critical for accurate estimates of ocean heat content and improved accuracies of data assimilation into models. I recommend the publication of this paper after some changes to the text and the data files.

### Answer

We thank the referee for the detailed review and the constructive comments to both the manuscript and the dataset that gave us the possibility to substantially improve the quality of our research. The specific answers to each comment are reported below and a new REP dataset version is provided at [https://doi.org/10.13127/rep\\_xbt\\_1999\\_2019.2](https://doi.org/10.13127/rep_xbt_1999_2019.2)

### Manuscript specific comments:

A big improvement to the dataset and manuscript would be the inclusion of uncertainty values with the data. Uncertainties are mentioned, but there is no development of or inclusion of the uncertainty data. Some brief discussion of derivation of the uncertainties should also be included.

A: We thank the reviewer for this suggestion. We decided to add the uncertainty specification based on the nominal instrument accuracy provided by the manufacturer, in agreement with Atkinson et al. (2014) and Cowley et al. (2021). The depth and temperature uncertainties are equal for all REP XBT profiles being gathered with probe types produced by Sippican, so we inserted them in the file global attributes (please check it here [http://oceanbo.ingv.it/erddap/info/REP\\_XBT\\_1999\\_2019\\_v2\\_metadata/index.html](http://oceanbo.ingv.it/erddap/info/REP_XBT_1999_2019_v2_metadata/index.html)) to not make the dataset heavier.

|           |           |                      |        |                                                                                                                                                                             |
|-----------|-----------|----------------------|--------|-----------------------------------------------------------------------------------------------------------------------------------------------------------------------------|
| attribute | NC_GLOBAL | depth_uncertainty    | String | depth<=230m: 4.6m;depth>230m: 2% (Table 2 from Cowley R et al., 2021 <a href="https://doi.org/10.3389/fmars.2021.689695">https://doi.org/10.3389/fmars.2021.689695</a> )    |
| attribute | NC_GLOBAL | TEMPET01_uncertainty | String | XBT = 0.10 deg C; XCTD = 0.02 deg C (Table 2 from Cowley R et al., 2021 <a href="https://doi.org/10.3389/fmars.2021.689695">https://doi.org/10.3389/fmars.2021.689695</a> ) |

Line 139-145 discusses measurement accuracy and uncertainties. A comment here about using manufacturer accuracies as an estimate of uncertainties would be beneficial, rather than use both terms interchangeably.

A: We thank the reviewer for highlighting this important aspect, we modified the text of Section 2.

For further corrections to the dataset, did you consider implementing the launch height correction from Bringas and Goni, 2015? You have all the launch heights from the vessels and by adding the

offset to the depths, you will get quite a different result in your comparisons. Bringas and Goni's results are robust and it will be a first for these corrections to be implemented in your dataset. Some of the vessels are 25m launch heights which equates to a 4m depth offset, a considerable impact on the thermocline depths. You could make the correction and include it in the data file to allow the user to remove it if required, in the same way as the calibration value has been done.

A: The algorithm developed by *Bringas and Goni (2015, hereafter BG15)* corrects the depth value calculated by standard FRE when the deployment height is different from about 3.0-4.0 m. BG15 approximates what happens in operational conditions. In fact, regardless of the mode and the probe impact speed with the sea surface, BG15 correction does not take into account the turbulence produced by the ship's wake in the water column crossed by the probe in the near surface layer, a perturbation that depends on the ship speed, its draft and the distance of the impact point from the side of the hull. The majority of the ships used to collect the REP datasets has operational speed greater than 20 knots (see Figure R3 below and the relative answer).

We found in the literature an unpublished communication from *Gilson, Roemmich and Johnson (2008)* that illustrates what happens when XBTs are launched from ships moving at different speeds, but it does not include any specific description about their behavior in the surface layer.

In our opinion, BG15 is a proper correction when the ship speed is close to zero, which is not the case for the majority of profiles in the REP dataset (Figure R1), so we preferred not to apply it to the REP dataset depth values and further investigate this issue in our next studies.

Figure R1 shows the distribution of launch heights per probe type, indicating that about 70% of the drops were from platforms at ~ 10-11 m height.

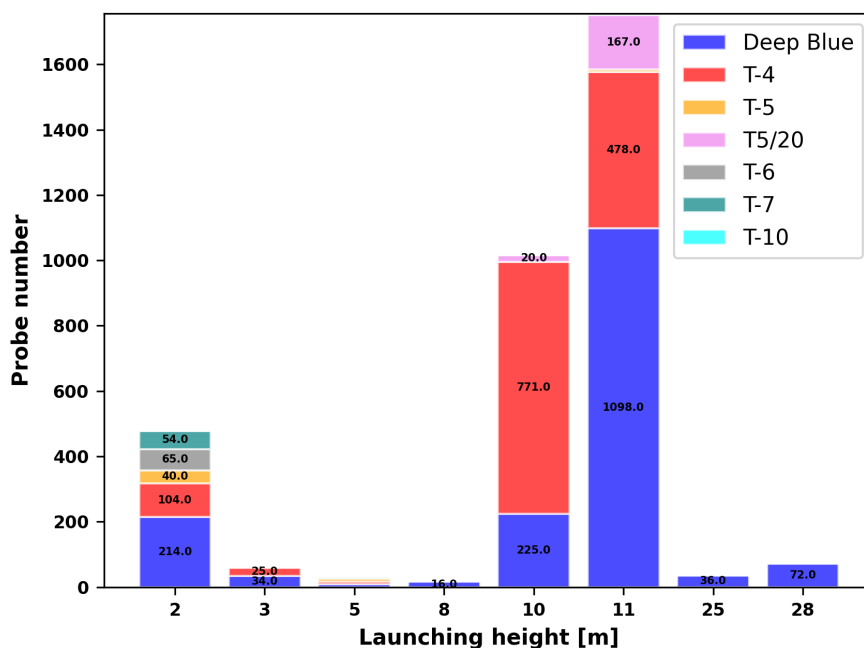

**Figure R1 - Distribution of XBT launch heights above the sea level per probe type in the REP dataset.**

You also could implement the fall rate corrections from Cheng et al 2014. Although this could be complicated if the launch height corrections are also implemented, I'm not aware of any investigations into how these two corrections would interact with each other.

A: We agree to apply the Cheng et al 2014 correction (CH14) and include it in the dataset as a separate variable. This new variable is also interpolated at each meter. In this way the user will have the possibility to consider the corrected version (CH14) of the profile according to his needs. We decided instead to not apply BG15 as motivated in our previous answer, avoiding any interaction with CH14.

Line 171-175: Does this mean that the test canister results were applied to the strip chart recording system at the time of data collection as an offset? Or were they simply used as a check, as is currently the case? I don't know if it is necessary to do this correction at all. My understanding is that the test canister allows you to check the system is earthed correctly, any failure in earthing will result in poor data collection and the test canister will show this. Also to show any faults in the launcher cable, launcher gun etc. Are there any references to suggest that the test canister offset should be applied (eg Reseghetti et al 2018, others)?

A: We would like to precize that the sentence was referring (not clearly) to the first years of SOOP activity in the Mediterranean Sea during MFS-PP and MFS-TEP projects and generally before 2008. As far as we know the test canister was used as a check. In general, this offset is not included during routine data collection but during data post-processing.

*Bordone et al. (2020)* and *Raiteri (2023, 1. P-11 Raiteri.pdf)* confirmed the improved agreement between XBT and reference profiles (CTD or Argo) evidenced by Reseghetti et al. (2018) using XBT profiles from SOOP activities. The application of the test canister correction has been suggested by field comparisons XBT vs. CTD (*Reseghetti et al., 2018*): XBT values showed a T difference nearly coincident with the test canister offset when compared with the corresponding CTD profiles.

The corresponding text in the manuscript has been modified.

Line 200: Great that you've got some numbers for evaluation of disposal of these materials at sea. Instead of including it in the Summary/Conclusions section only, it would be good to have a few sentences in the results section perhaps about the total amounts for this dataset. Or even in table 1, which I think only has values on a per probe basis. The table headings need to indicate it is per-probe, not total.

A: The sentence has been moved at the end of Section 3, where the dataset is described. The other suggestions have been also considered and included in the new manuscript version.

Line 246: What is the 'evident "noise"' referring to? Is it electrical interference (high frequency noise) perhaps? Perhaps it was an earthing fault? Did your AQC pick up this noise in a particular test? Perhaps a quick sentence suggesting a source for the noise or what it looked like? Or remove this reference.

A: The new manuscript version adds details and provides a better description of the problem. We had to deal with noise of different origins: one external connected to atmospheric factors (primarily the wind) and one intrinsic to the specific acquisition system used (Figure R2), which manifested itself with "value variations" of very different amplitude and frequency that our algorithms could not capture. Figure R2 shows the behavior of nearly collocated XBT profiles recorded with two different DAQs within a few days.

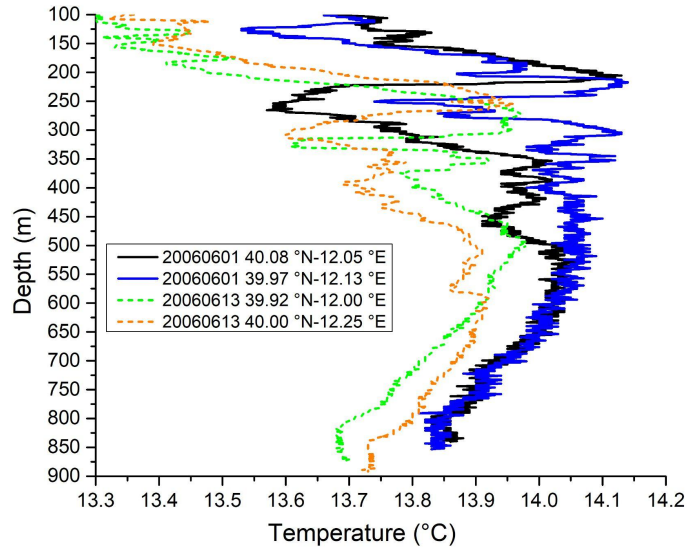

**Figure R2 - Comparison between profiles recorded with two different DAQs in the same area (south Tyrrhenian sea) about twelve days apart. The black and blue lines are from an MK21-ISA with problems with its electronic components while the orange and green lines are from an MK12.**

Line 307: Change 'indexes' to 'flags' and 'those repeated during data taking' to 'duplicates'. Or is it 'replicates'? If duplicates (ie, the same data copied), these should definitely be removed. If replicates (ie, two different profiles taken close together in time), these should not be removed. I also think removing data that fails in less than 50m is not the right thing to do. The data should be flagged where it is bad, but if it contains some good data, it should be kept.

A: We changed 'those repeated during data taking' to 'replicates' since the profiles have been repeated as soon as the operator realized that they had evident problems. We decided not to include these profiles because they would have been labeled with all BAD quality flags. We instead decided to integrate the dataset with those profiles having good data only within the first 50 m of depth, as suggested by the reviewer.

Line 322-326: Is there any attempt to correct positions or do you lose these data because they are 'on land'? Since you have re-processed from the start, you should be able to correct positions for at least some of the profiles. There is no mention of a date/time check (or ship speed check) - was this investigated?

A: There are not profiles are on land in the REP dataset, since the operators checked both the position and the launch time before the data transmission to the ENEA-STE. Since we did not encounter specific issues with date/time we did not implement additional checks.

Table 2 and Surface Check: The exit values of 49-52 are not very descriptive compared to the other tests. I would suggest updating them to include 'Surface check' or similar so it doesn't get confused with the SDN flag codes and is clearer for the user of the data. It will mean updating the data file variable attributes too.

A: We thank the reviewer for the suggestion but we prefer to keep these exit values in the data files modifying their meaning in Table 2.

49: T difference < 1 SD

50: 1 SD < T difference < 2 SD

51: 2 SD < T difference < 3 SD

52: T difference > 3 SD

Line 515-516 and Figure 7. The intervals described in the text are not clear in the figures. The bias figures perhaps need some lines showing these intervals? And I think that the figure needs 'Dec-May' and 'Jun-Nov' instead of 'mixed' and 'stratified' to be consistent with the text. Line 518 should also refer to the month period rather than 'mixed'. The brackets in the x-axis label are not clear.

A: The figure and the text have been modified as suggested by the reviewer.

Line 647-649: the depth in figure 12c is 500 to 800 m and shows a negative average bias, not consistent with the positive bias in the deeper part of figure 11a (which is 800-2000m and solely due to T5 probes). I don't think the steps have any impact on the average bias, but do cause the positive spikes in the figure 12c T difference plot.

A: We thank the reviewer for pointing this out. We further checked the deep profiles between 800-2000m and we agree that the steps do not have an impact on the average bias, which is mainly due to the calibration. The text and figure 12 have been modified accordingly:

*“Figure 12 shows examples of matching REP and SDN profiles and their difference with a zoom in the surface (a) and bottom layer (b and c), where the largest differences occur. During the stratified period, the largest differences reside in the thermocline and can exceed 1.5 °C (Figure 12a), while in the bottom layer the calibration correction (see Figure 12b, c) together with the abrupt decrease of the number of data explain the small positive average bias in Figure 11a. In fact, numerous T5/20 profiles were launched (~7% of the total) in the few campaigns in which the acquisition system showed significant negative anomalies (up to - 0.1 °C, see Figure 5a) and this influenced both BIAS and RMSD profiles below 900 m depth. The frequent step-like shape of deep profiles (Figure 12c), due to double diffusion processes (Meccia et al. 2016; Durante et al., 2021), causes instead positive spikes in the difference profiles.”*

#### **Editing corrections/grammar suggestions:**

line 24: insert SDN acronym after the Seadatanet name.

A: Done

Line 25: The link does not work when clicked, seems to be a different link to what is written.

A: We apologize for this. We checked and clicking from the web page the URL works <https://essd.copernicus.org/preprints/essd-2023-525/#discussion>, it does not work from the downloaded pdf. We copy it here [https://cdi.seadatanet.org/search/welcome.php?query=1866&query\\_code={4E510DE6-CB22-47D5-B221-7275100CAB7F}](https://cdi.seadatanet.org/search/welcome.php?query=1866&query_code={4E510DE6-CB22-47D5-B221-7275100CAB7F})

Line 29: June to November perhaps, as written later in the text?

A: We thank the reviewer for noticing this, we corrected it.

Line 34: Is there a full name for the ERRDAP acronym? If so, include here.

A: Done

Line 44: 'to re-analyze' change to 'reanalysis of'

A: Done

Line 68: WOD link does not work, doesn't match the text.

A: We apologize for it but we do not understand why this happened, we will double check all the links in the revised manuscript before submission.

Line 66-70: this sentence is missing something grammatically, please review.

A: The sentence has been rephrased: "This data review originated from the recognition that the historical XBTs from the Ligurian and Tyrrhenian Seas, presently available in the main marine data infrastructures - SDN (<https://www.seadatanet.org/>), WOD (<https://www.ncei.noaa.gov/products/world-ocean-database>), Copernicus Marine Service (CMS, <https://marine.copernicus.eu/>) - have incomplete metadata description and the data might also differ."

Line 85: Add full words for DAQ acronym (Data Acquisition System)

A: Done

Line 88: is there a reference for latest documented QC procedures?

A: We have added Cowley et al. (2022), Parks et al. (2022), Good et al. (2023) and Tan et al. (2023) references.

Line 99: link fails when clicked.

A: We apologize for it but the URL is correct and we do not understand why this happened. We will double check all the links in the revised manuscript before submission. <https://progetti.ingv.it/it/progetti-dipartimentali/ambiente/macmap>

Line 119: Add "Negative Temperature Coefficient" for NTC acronym

A: Done

Line 124: '1960's' is stated as 1990's in appendix A, Line 776. Please check, probably it's since probes were built, so 1960's is likely correct.

A: We thank the reviewer for noticing it. The text in Section 2 has been modified to explain and justify the indicated periods.

Line 126: change 'clockwise in' to 'clockwise from' and 'counterclockwise in' to 'counterclockwise from'

A: Done

Line 127: suggest rewording to 'decouples the XBT vertical motion from the translational ...

A: Done

Line 131: suggest removing 'phenomenological', not required here.

A: Done

Line 135: replace 'thus' with 'then'

A: The phrase has been slightly modified including your suggestion:

“The software transforms a time series of resistance values sensed by the thermistor into a series of depth - T values using first a resistance-to-temperature conversion relationship (identical for all XBT types because it is specific for the thermistor used, see Appendix A) and then calculating the corresponding depth values by applying a specific FRE for each probe type.”

Line 144: 'and slightly' doesn't make sense in this sentence.

A: The text has been modified.

Line 146-150: This sentence is too long and confusing and I'm not sure what the purpose is of including it is. I also don't understand 'in order to have a practically unchanged measurand' in this sentence. Please review.

A: The text has been modified as suggested by both reviewers and new details have been inserted to answer some of their questions:

*“Bordone et al. (2020) compared XBT profiles from SOOP activities in the Ligurian and Tyrrhenian Sea with quasi contemporaneous ( $\pm 1$  day) and co-located (distance smaller than 12 km) Argo profiles. The XBT profiles used by Bordone et al. (2020) are included in the REP dataset but they went through a different QC and interpolation procedure that could slightly modify their results. In the 0-100 m layer, the mean T difference was 0.24 °C (the median 0.09 °C) and the Standard Deviation (SD) was 0.67 °C. Below 100 m depth, the XBT measurements were on average 0.05 °C warmer than the corresponding Argo values (mean and median were almost coincident) and the SD was 0.10°C. This last SD value agrees with the manufacturer specification and the T uncertainty value reported by Cowley et al. (2021), which has been assigned to the REP data. The values estimated by Bordone et al. (2020) for the surface and sub-surface layer (depth < 100 m) are instead affected by both the XBT (4.6 m) and Argo (2.4 dbar) depth uncertainty estimation, meaning that a small variation in depth could correspond to a large variation in temperature especially when the seasonal thermocline develops, so that the comparison with Argo values would not be significant. The specified uncertainties are independent of the systematic error or bias affecting the XBT temperature and depth measurements, that have been corrected in the REP dataset applying the Cheng et al. (2014) correction scheme.”*

Line 150: Include 'standard deviation' with SD acronym

A: Done

Line 152: I disagree that it is a 'few tens of meters', equivalent to more than 20 meters. The reference states only a few meters to reach stable velocity.

A: Thanks for the correction, it is our mistake in defining the range within which the phenomenon occurs. The text has been modified.

Line 159: replace 'depends on specific FRE with actual' to 'has'

A: Done

Line 160: remove 'reading'

A: Done

Line 164-166: This sentence is a little confusing, please review.

A: The sentence has been rephrased. “The computer clock, always updated to the UTC value before and after the data gathering, provides the time coordinate of each profile with a sensitivity of 1 s. The differences recorded with respect to the UTC standard time have always been no greater than 1 s over a 24 hour time frame.”

Line 170: 'is binding for subsequent optimal use' could be better written

A: The sentence has been rephrased: “... is highly recommended for an optimal use of XBT measurements.”

Line 171-175: the grammar is quite awkward and could be better written.

A: The sentence has been rephrased: “When strip chart recorders were used, a preliminary and accurate calibration of the acquisition unit using a tester was mandatory (e.g. Sippican, 1968 and 1980; Plessey-Sippican, 1975). With the advent of digital systems this procedure was also recommended (Bailey et al., 1994).”

Line 182: Are you using accuracy and uncertainty terms interchangeably here?

A: We apologize for the improper use of the terms, we modified the text to avoid confusion.

Line 184: suggest changing 'thanks to a' to 'with a'

A: Done

Line 185: remove 'of'

A: Done

Line 189: remove 'of'

A: Done

Line 193: Why would ship speed affect the duration of the data acquisition? The probes are designed to take the ship speed out, as you have stated earlier.

A: We report hereafter an additional analysis of the ship speed versus the depth of the last good T value to show the influence of the ship speed on the duration of the acquisition (equivalent to the length of the profile).

Figure R3 shows the distribution of the ship speed at the XBT launch time per probe type for the REP dataset, which reflects the characteristics of the vessels used. The GNV ships, from which most of the probes were launched, usually travel between 21.5 and 23.5 knots, a speed higher than the nominal values for all XBT types, except the T4 model. The ship speed can influence not only the duration of the acquisition (i.e. the maximum depth achievable with acquisition software in full acquisition mode) but also the quality of the recording, which degrades at very high speed.

Figure R4 shows two DB profiles gathered at a distance of ~ 12 nm but at different ship speeds: the profile collected at higher speed is shorter (724 m instead of 850 m) and noisier than the other one.

Figure R5 shows the mean and the median of the depths associated with the last good T value (Last Good Depth) for DB probes as a function of the ship speed. It is evident the shortening of the profile when the ship speed increases. The anomaly at 17-18 knots can be explained by cruises with



container ships having a very high launching platform (25 m or more) associated with bad weather conditions

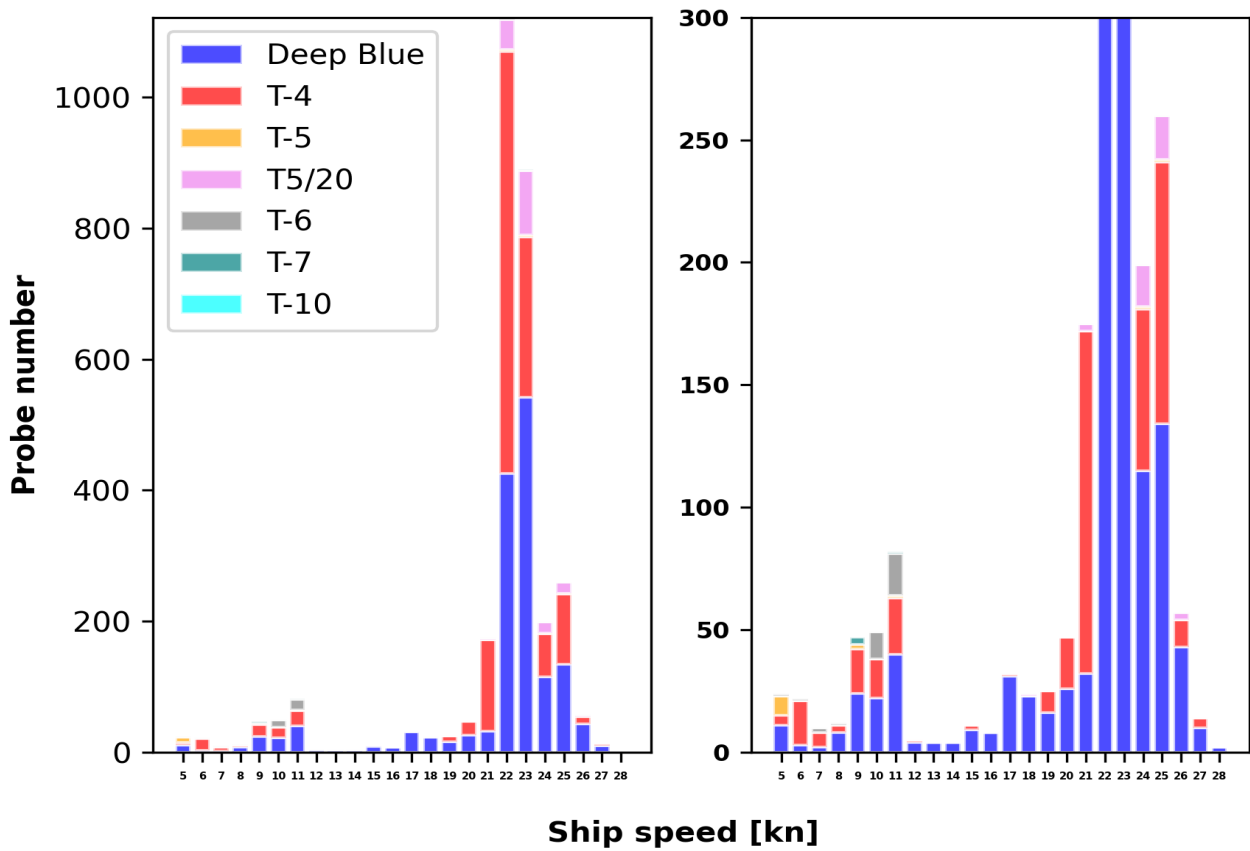

Figure R3 (Left panel) Distribution of the XBT probes used in the REP the dataset as a function of the ship speed. (Right panel) zoom.

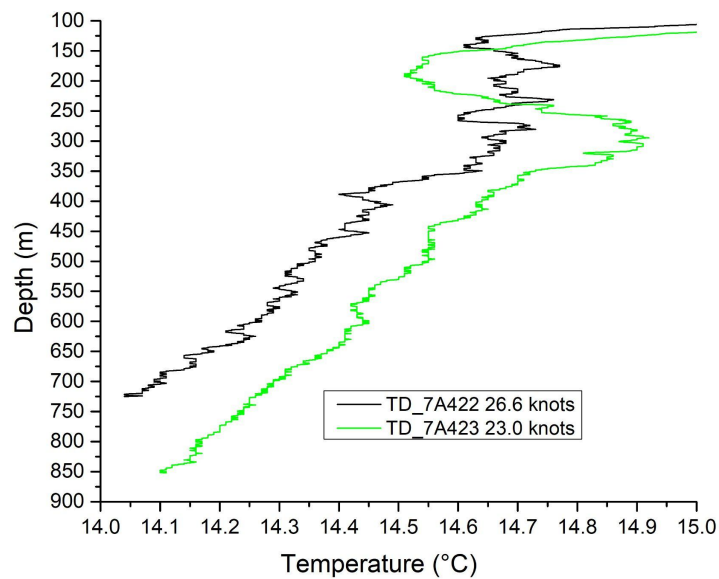

Figure R4 - Two DB profiles gathered consecutively but at different ship speeds.

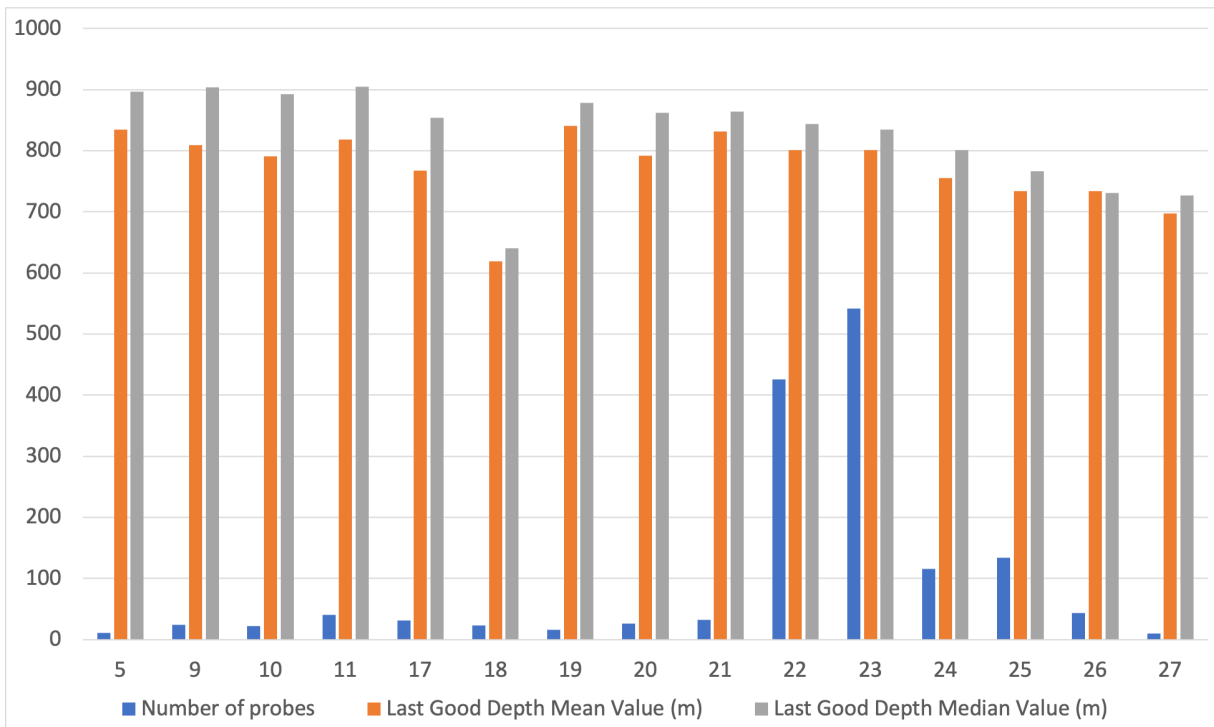

**Figure R5 The mean and the median of the depth associated with the last good temperature value for DB probes (dropped with software set as free terminal depth) as a function of the ship speed.**

Line 198: Include full name for ZAMAK

A: Done

Line 266: remove 'only'

A: Done

Line 280: change 'masses' to 'mass'

A: Done

Line 290: add 'Delayed Mode' for DM acronym

A: It is already specified in the Introduction.

Line 289 & 292: Link fails when clicked

A: We apologize for it but the URLs are correct and we do not understand why this happened. We will double check all the links in the revised manuscript before submission.

Line 306: change 'eventually remove it' to 'remove it if required'. Also change 'profiles' to 'data' and 'eliminated' to 'deleted'.

A: Done

Line 310: remove 'implemented'

A: Done

Line 316: Suggest changing to 'Automated Quality Control overview' or 'Automatic Quality Control procedure'

A: Done

Line 319: Change 'flag' to 'exit value' to be consistent with Table 2.

A: Done

Line 325-326, 329: suggest using the same terminology as is in table 2, rather than 'GOOD' and 'BAD'.

A: Done

Line 355: Change 'It' to 'The Gross range check'

A: Done

Line 343-345: suggest changing to "The XBT measurements close to the sea surface are usually considered unreliable due to the time taken to reach terminal velocity (Bringas and Goni, 2015) and due to the time taken for the probe to reach thermal equilibrium (need a reference here) and are thus excluded from further analysis (e.g. Bailey et al., 1994; Cowley and Krummel, 2022).

A: The new sentence has a modified structure (with additional details) in order to better describe the problem and the proposed way out.

Line 345-347: Suggest changing to: 'We here implement a surface test that flags data and retains all original measurements.'

A: This suggestion has been included in a new sentence.

Line 347: remove 'proposed' as you have implemented it.

A: Done

Line 348: need a reference for the 'first value currently considered acceptable'

A: New version includes a historical note and references.

Line 390: should be figure 4a

A: Done

Line 467: suggest removing 'k-th' as it's confusing. Or re-write?

A: We have substituted 'k-th' with 'k' in the 4.3.1 section

Line 489-490: suggest changing 'crossing the water column and measuring' to 'deployed' or 'recording'

A: New sentence has been prepared.

Line 491: suggest removing '("hot" or "cold" probe or possible troubles during the acquisition)' as it is unnecessary and leads to questions about what is meant by hot and cold probes.

A: The new version avoids these terms.

Line 545: Suggest 'The QC algorithms applied to the dataset are not capable of catching all erroneous values.'

A: Done

Line 549: remove 'deeply'. Change 'by visual check' to 'using visual checks'. Change 'In specific' to 'Specifically'.

A: Done

Line 550: Change 'tuned by' to 'using'

A: Done

Line 551: change 'minimize to flag as BAD data the GOOD ones.' to 'minimize flagging of BAD data as GOOD.'

A: Done

Line 553: 'from a visual'

A: Done

Line 555: change to 'flagging of GOOD data as BAD, as shown....'

A: Done

Line 558: remove 'instead'

A: Done

Line 559: change to 'true positive spikes (a) and false positive spikes (b)'

A: Done

Line 561: 'features that the automatic'

A: Done

Line 563: remove 'happened or'. Change 'The indispensable premise is the' to 'The decision is based on the'

A: Done

Line 575: suggest removing 'non-zero' as if there is wind it is of course non-zero

A: Done

Line 578: remove 'also', already used earlier in the sentence.

A: Done

Line 582: remove "'cleanliness" of the'

A: Done

Figure 8 & 9 titles have underscores in them which have turned text into subscripts. They are also a bit cryptic for the reader, perhaps useful in analysis but could be improved for the manuscript.

A: Done

Figure 8 caption for (b) should 'true' be 'false', as in the text?

A: Thank you for noticing this, we have corrected it.

Figure 9 caption: change '(a) true spikes; (b) false spike' to '(a) true positive spikes; (b) false positive spike'

A: Done

Line 599-608: too many words in quotations. Suggest removing all the quotation marks.

A: Done

Line 599: change to '...identify the external influences that cause high frequency noise in the T profile...'

A: Done

Line 606 - 607: change to: 'In some cases, the automated QC BAD attribution was changed to GOOD after the comparison with adjacent profiles that present similar characteristics.'

A: Done

Line 612: hyperlink is not the same as the text

A: We apologize for this inconvenience, we will double check them in the revised manuscript.

Figure 10: I suggest these axes be re-shaped to portrait mode and increase the scale for temperature to avoid viewing the 0.01 resolution steps in the data. The way they are set out at the moment makes it very difficult for the reader to see the features that are talked about. The main focus is the noise, not the inversions.

A: A revised figure has been inserted.

Line 631: 'profiles without correction' and 'non-corrected profiles' are the same thing. One should be 'corrected'.

A: We thank the reviewer for noticing this, we have corrected: "The bias is larger ( $\sim 0.06$  °C) when estimated from profiles without calibration correction and slightly smaller ( $\sim 0.04$  °C) from calibrated profiles..."

Line 635: change 'quite constant' to 'consistent'

A: Done

Figure 11: What is the black line in the plots? Only two of the colours are referenced, but there are three.

A: Thank you for pointing this out, we added the legend to subplot (a).

Line 645: is 'relative' differences referring to the dt/dz within a profile?

A: The phrase has been corrected "Figure 12 shows an example of matching REP and SDN profile and their difference". The caption of Figure 12 has also been modified "... (a) whole profiles on the left and their difference on the right;..."

Line 669: 'The adoption of a Gaussian filter...' is this referring to the SDN dataset?

A: Yes, it is. We specified it: "The adoption of a Gaussian filter in SDN data (Manzella et al., 2003; 2007) ..."

Line 736: Rebecca Cowley is not a Dr.

A: Done

Line 758-759: remove 'because it is an essential component to get good quality XBT measurements.'

A: Done

Line 822: is 'URN' defined anywhere, if not please define.

A: Thanks for noticing it, we added the definition URN (Uniform Resource Name).

Line 870 & 879: Remove 'Moreover'

A: Done

Line 884-886: change to: 'Ship speed, wind speed, and probe mass (available since 2018) have been added to this metadata section, when available.' Remove the rest.

A: Done

#### Data file comments:

Thank you for including raw data and the temperature calibration values that can be subtracted. This makes the data file versatile for the user.

- I suggest replacing the 'TEMPE01' name in the variables with 'TEMPERATURE' to make it easier to read.

A: We understand the reviewer's suggestion but the variable name comes from the use of P01 SDN vocabulary, we cannot modify it. Please look at [https://vocab.seadatanet.org/v\\_bodc\\_vocab\\_v2/browse.asp?order=conceptid&formname=search&screen=0&lib=p01&v0\\_0=TEMPET01&v1\\_0=conceptid,prelabel,altlabel,definition,modified&v2\\_0=0&v0\\_4=&v1\\_4=modified&v2\\_4=9&v0\\_5=&v1\\_5=modified&v2\\_5=10&x=0&y=0&v1\\_6=&v2\\_6=&v1\\_7=&v2\\_7=](https://vocab.seadatanet.org/v_bodc_vocab_v2/browse.asp?order=conceptid&formname=search&screen=0&lib=p01&v0_0=TEMPET01&v1_0=conceptid,prelabel,altlabel,definition,modified&v2_0=0&v0_4=&v1_4=modified&v2_4=9&v0_5=&v1_5=modified&v2_5=10&x=0&y=0&v1_6=&v2_6=&v1_7=&v2_7=)

Is the TEMPET01\_TEST\_QC variable additive? I suspect so since there are values of 581 in the variable, which means that more than one test is failed at a given depth. If so, please review this

information about when to use 'flag\_values' and 'flag\_masks' attributes. I think it needs to be 'flag\_masks' if it is additive. And, the 'flag\_values' attribute should be bit values that can be decoded unambiguously into the individual 'flag\_meanings' associated with each bit.

A: We thank the reviewer for pointing this out. The TEMPET01\_TEST\_QC variable includes the exit values of all QC tests, with each column corresponding to a test output, as detailed in Table 2. Flag values of 581, 582 or 571, 572 are assigned from the vertical gradient check, which is applied 3 times in an iterative way. Measurements with corresponding out of range vertical gradient values are flagged (58 or 57 depending on the gradient sign) and discarded when vertical gradient values are re-computed. 581 and 571 flags are used during the second loop check, 582 and 572 during the third loop check. TEMPET01\_TEST\_QC is then used to map the tests' exit values to the ancillary variable TEMPET01\_FLAGS\_QC, as explained in section 4.2. Moreover, for the TEMPET01\_TEST\_QC and DEPTH\_TEST\_QC variables, we decided to follow the SDN approach and we maintained only some of the mandatory attributes (flag\_values, flag\_meanings) adapted to the QC tests needs.

The text in section 4.1 has been modified: "Results of each test are recorded by inserting the relative exit value to the corresponding measurement in TEMPET01\_TEST\_QC ancillary variable according to the scheme shown in Table 2"

The text in section 4.2 has been modified: "Each basic QC test assigns a corresponding exit value (Table 3) to each original depth (DEPTH\_TEST\_QC) and T record (TEMPET01\_TEST\_QC) within the vertical profile ..."

- There are many global attributes that need to be made into variables. I downloaded a netcdf file via the ERDDAP server and it created one netcdf file with many profiles dimensioned by 'row'. That means that all of the global variables that would apply to ONE profile now do not apply and need to be made into variables. For example: fall\_rate\_equation\_Coeff\_1, fall\_rate\_equation\_Coeff\_2, probe\_type information, launch\_height information, serial numbers, platform codes and so on. Similarly, if I look at an ascii line dump of the data, all of the attribute names contained in 'global attributes' section of the netcdf files are missing. Please review these global attributes carefully. The text in the appendix will also need updating if these items are moved to variables.

A: An url\_metadata variable has been inserted. Now the metadata associated with each profile can be retrieved through the profile\_id and cruise\_id variables. A python script has also been added in the Appendix C to facilitate the user.

- Attributes for the variables: please check these. Some have incorrect attributes (eg, DEPTH\_\*\_QC variables have a 'standard\_name' attribute of 'depth' where it should be '\* status\_flag'). The 'TEMPE01' variables are missing a standard\_name attribute ('sea\_water\_temperature').

A: The standard name for DEPTH\_\*\_QC is created by ERDDAP automatically: It has been corrected and for all the variables it was inserted "status\_flag". The same approach has been followed for TEMPET01\_\*\_QC.
